# Supplementary material for: Gliding motility of the diatom Craspedostauros australis coincides with the intracellular movement of raphid-specific myosins
Source: PubMed Central journal article supplement (PMC11420354; doi:10.1038/s42003-024-06889-w), 2024-09-23
Supplement: 42003_2024_6889_MOESM2_ESM.pdf [file 42003_2024_6889_MOESM2_ESM.pdf]

**Gliding motility of the diatom *Craspedostauros australis* coincides with the intracellular movement of raphid-specific myosins**

Metin Gabriel Davutoglu<sup>1</sup>, Veikko F. Geyer<sup>1</sup>, Lukas Niese<sup>1</sup>, Johannes Müller<sup>2</sup>, Marcelo Leomil Zoccoler<sup>2</sup>, Valeria Sabatino<sup>1</sup>, Robert Haase<sup>2</sup>, Nils Kröger<sup>1,2,3</sup>, Stefan Diez<sup>1,2, 4\*</sup>, Nicole Poulsen<sup>1\*</sup>

<sup>1</sup> B CUBE - Center for Molecular Bioengineering, TUD Dresden University of Technology, 01307 Dresden, Germany

<sup>2</sup> Cluster of Excellence Physics of Life, TUD Dresden University of Technology, 01062 Dresden, Germany

<sup>3</sup> Faculty of Chemistry and Food Chemistry, TUD Dresden University of Technology, 01062 Dresden, Germany

<sup>4</sup> Max Planck Institute of Molecular Cell Biology and Genetics, 01307 Dresden, Germany

\*correspondence to: stefan.diez@tu-dresden.de, nicole.poulsen@tu-dresden.de

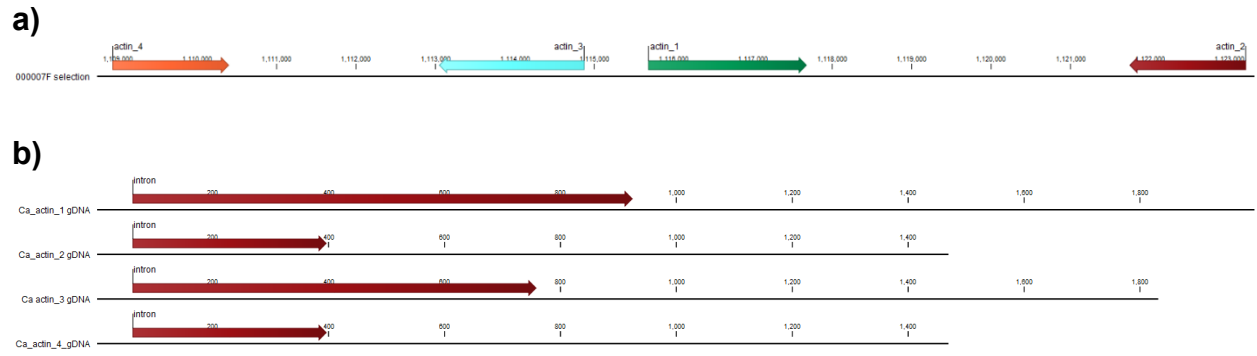

**Supplementary Figure 1: (a)** Genomic arrangement of the four *C. australis* actin genes on the Pacbio Genome assembly contig 7F<sup>1</sup> **(b)** Gene structure of the four *C. australis* actin genes showing the position of the intron.

|         |                                                                    |     |
|---------|--------------------------------------------------------------------|-----|
| actin_1 | MSDDEDIAALVIDNGSGMCKAGFAGDDAPRSVFP<br>SLIGRARQPGIMVGMEQRDAYVVGDEA  | 60  |
| actin_2 | MSDDEDIAALVIDNGSGMCKAGFAGDDAPRSVFP<br>SLIGRARQPGIMVGMEQRDAYVVGDEA  | 60  |
| actin_3 | MSDDEDIAALVIDNGSGMCKAGFAGDDAPRSVFP<br>SLIGRARQPGIMVGMEQRDAYVVGDEA  | 60  |
| actin_4 | MSDDEDIAALVIDNGSGMCKAGFAGDDAPRSVFP<br>SLIGRARQPGIMVGMEQRDAYVVGDEA  | 60  |
|         | *****                                                              |     |
| actin_1 | QAKRGVLTLYKPIEHGIVTNWDDMEKIWHHTFY<br>NELRVAPPAHPVLLTEAPQNPKANRER   | 120 |
| actin_2 | QAKRGVLTLYKPIEHGIVTNWDDMEKIWHHTFY<br>NELRVAPPAHPVLLTEAPQNPKANRER   | 120 |
| actin_3 | QAKRGVLTLYKPIEHGIVTNWDDMEKIWHHTFY<br>NELRVAPPAHPVLLTEAPQNPKANRER   | 120 |
| actin_4 | QAKRGVLTLYKPIEHGIVTNWDDMEKIWHHTFY<br>NELRVAPPAHPVLLTEAPQNPKANRER   | 120 |
|         | *****                                                              |     |
| actin_1 | MTQIMFETFNVPAMYVNIQAVLSLYASGRTTGC<br>VLDSDGVDGVTHTVPIYEGYALPHAVIRL | 180 |
| actin_2 | MTQIMFETFNVPAMYVNIQAVLSLYASGRTTGC<br>VLDSDGVDGVTHTVPIYEGYALPHAVIRL | 180 |
| actin_3 | MTQIMFETFNVPAMYVNIQAVLSLYASGRTTGC<br>VLDSDGVDGVTHTVPIYEGYALPHAVIRL | 180 |
| actin_4 | MTQIMFETFNVPAMYVNIQAVLSLYASGRTTGC<br>VLDSDGVDGVTHTVPIYEGYALPHAVIRL | 180 |
|         | *****                                                              |     |
| actin_1 | DLAGRDLTEYLMKILTERGYSLTTAEREIVRDI<br>KESLCFVAVDFEEMKKAESSALEK      | 240 |
| actin_2 | DLAGRDLTEYLMKILTERGYSLTTAEREIVRDI<br>KESLCFVAVDFEEMKKAESSALEK      | 240 |
| actin_3 | DLAGRDLTEYLMKILTERGYSLTTAEREIVRDI<br>KESLCFVAVDFEEMKKAESSALEK      | 240 |
| actin_4 | DLAGRDLTEYLMKILTERGYSLTTAEREIVRDI<br>KESLCFVAVDFEEMKKAESSALEK      | 240 |
|         | *****                                                              |     |
| actin_1 | SFELPDGNIIVIGNERFRCPEVLFQPNLTGLEMD<br>GIGDSTFQTIMKCDVDIRKDLIANIV   | 300 |
| actin_2 | SFELPDGNIIVIGNERFRCPEVLFQPNLTGLEMD<br>GIGDSTFQTIMKCDVDIRKDLIANIV   | 300 |
| actin_3 | SFELPDGNIIVIGNERFRCPEVLFQPNLTGLEMD<br>GIGDSTFQTIMKCDVDIRKDLIANIV   | 300 |
| actin_4 | SFELPDGNIIVIGNERFRCPEVLFQPNLTGLEMD<br>GIGDSTFQTIMKCDVDIRKDLIANIV   | 300 |
|         | *****                                                              |     |
| actin_1 | LSGGTTFMFPGISERMSKEITALAPASIKVKIV<br>APPERKYSVWIGGSILASLSTFQSMWIS  | 360 |
| actin_2 | LSGGTTFMFPGISERMSKEITALAPASIKVKIV<br>APPERKYSVWIGGSILASLSTFQSMWIS  | 360 |
| actin_3 | LSGGTTFMFPGISERMSKEITALAPASIKVKIV<br>APPERKYSVWIGGSILASLSTFQSMWIS  | 360 |
| actin_4 | LSGGTTFMFPGISERMSKEITALAPASIKVKIV<br>APPERKYSVWIGGSILASLSTFQSMWIS  | 360 |
|         | *****                                                              |     |
| actin_1 | KEEYDESGPSIVHRKCF*                                                 | 377 |
| actin_2 | KEEYDESGPSIVHRKCF*                                                 | 377 |
| actin_3 | KEEYDESGPSIVHRKCF*                                                 | 377 |
| actin_4 | KEEYDESGPSIVHRKCF*                                                 | 377 |
|         | *****                                                              |     |

**Supplementary Figure 2:** Clustal Omega alignment of the four *C. australis* actin protein sequences showing a single amino acid exchange. Identical amino acid residues are highlighted in grey and indicated with an asterisk (\*), a : (colon) indicates conservation between groups of strongly similar properties.

|              |                                                                        |     |
|--------------|------------------------------------------------------------------------|-----|
| actin_4_cDNA | ATGTCTGACGATGAAGATATCGCCGCCTTGTTCATCGACAACGGTTCGGAATGTGCAAA            | 60  |
| actin_3_cDNA | ATGTCTGACGACGAAGATATCGCCGCCTTGTTCATCGACAACGGTTCGGAATGTGCAAG            | 60  |
| actin_1_cDNA | ATGTCTGACGACGAAGATATCGCCGCCTTGTTCATCGACAACGGTTCGGAATGTGCAAA            | 60  |
| actin_2_cDNA | ATGTCTGACGATGAAGATATCGCCGCCTTGTTCATCGACAACGGTTCGGAATGTGCAAA<br>*****   | 60  |
| actin_4_cDNA | GCCGGATTTCGCTGGAGATGACGCCCCACGCTCCGTCTTCCCATCCCTCATCGGACGTGCC          | 120 |
| actin_3_cDNA | GCCGGATTTCGCTGGAGATGACGCCCCACGCTCCGTCTTCCCATCCCTCATCGGACGTGCC          | 120 |
| actin_1_cDNA | GCCGGATTTCGCTGGAGATGACGCCCCACGCTCCGTCTTCCCATCCCTCATCGGACGTGCC          | 120 |
| actin_2_cDNA | GCCGGATTTCGCTGGAGATGACGCCCCACGCTCCGTCTTCCCATCCCTCATCGGACGTGCC<br>***** | 120 |
| actin_4_cDNA | CGCCAGCCAGGTATCATGGTTGGTATGGAGCAGCGTGACGCATACGTCGGTGACGAGGCA           | 180 |
| actin_3_cDNA | CGCCAGCCAGGTATCATGGTTGGTATGGAGCAGCGTGACGCATACGTCGGTGATGAGGCA           | 180 |
| actin_1_cDNA | CGCCAGCCAGGTATCATGGTTCGGTATGGAGCAGCGTGACGCATACGTCGGTGACGAGGCA          | 180 |
| actin_2_cDNA | CGCCAGCCAGGTATCATGGTTCGGTATGGAGCAGCGTGACGCATACGTCGGTGACGAGGCA<br>***** | 180 |
| actin_4_cDNA | CAGGCCAAGCGTGGTGTCTCACACTGAAGTACCCAATCGAGCACGGTATCGTCACCAAC            | 240 |
| actin_3_cDNA | CAGGCCAAGCGTGGTGTCTCACACTGAAGTACCCAATCGAGCACGGTATCGTCACCAAC            | 240 |
| actin_1_cDNA | CAGGCCAAGCGTGGTGTCTCACACTGAAGTACCCAATCGAGCACGGTATCGTCACCAAC            | 240 |
| actin_2_cDNA | CAGGCCAAGCGTGGTGTCTCACACTGAAGTACCCAATCGAGCACGGTATCGTCACCAAC<br>*****   | 240 |
| actin_4_cDNA | TGGGACGATATGGAGAAGATCTGGCATCACACCTTCTACAACGAGTCCGTGTGCGCCCA            | 300 |
| actin_3_cDNA | TGGGACGATATGGAGAAGATCTGGCATCACACCTTCTACAACGAGTCCGTGTGCGCCCA            | 300 |
| actin_1_cDNA | TGGGACGATATGGAGAAGATCTGGCATCACACCTTCTACAACGAGTCCGTGTGCGCCCA            | 300 |
| actin_2_cDNA | TGGGACGATATGGAGAAGATCTGGCATCACACCTTCTACAACGAGTCCGTGTGCGCCCA<br>*****   | 300 |
| actin_4_cDNA | GAGGCCACCCAGTCTGTCTCACCGAGGCCCCACAGAACCCAAGGCCAACCCGGAACGT             | 360 |
| actin_3_cDNA | GAGGCCACCCAGTCTGTCTCACCGAGGCCCCACAGAACCCAAGGCCAACCCGGAACGT             | 360 |
| actin_1_cDNA | GAGGCCACCCAGTCTGTCTCACCGAGGCCCCACAGAACCCAAGGCCAACCCGGAACGT             | 360 |
| actin_2_cDNA | GAGGCCACCCAGTCTGTCTCACCGAGGCCCCACAGAACCCAAGGCCAACCCGGAACGT<br>*****    | 360 |
| actin_4_cDNA | ATGACCCAGATCATGTTTCGAGACCTTCAACGTCCCGCCATGTACGTCAACATCCAGGCC           | 420 |
| actin_3_cDNA | ATGACCCAGATCATGTTTCGAGACCTTCAACGTCCCGCCATGTACGTCAACATCCAGGCC           | 420 |
| actin_1_cDNA | ATGACCCAGATCATGTTTCGAGACCTTCAACGTCCCGCCATGTACGTCAACATCCAGGCC           | 420 |
| actin_2_cDNA | ATGACCCAGATCATGTTTCGAGACCTTCAACGTCCCGCCATGTACGTCAACATCCAGGCC<br>*****  | 420 |
| actin_4_cDNA | GTCCTCTCCCTGTACGCCTCTGGACGTACCACCGGATGCGTGTGGACTCCGGTGATGGT            | 480 |
| actin_3_cDNA | GTCCTCTCCCTGTACGCCTCTGGACGTACCACCGGATGCGTGTGGACTCCGGTGATGGT            | 480 |
| actin_1_cDNA | GTCCTCTCCCTGTACGCCTCTGGACGTACCACCGGATGCGTGTGGACTCCGGTGATGGT            | 480 |
| actin_2_cDNA | GTCCTCTCCCTGTACGCCTCTGGACGTACCACCGGATGCGTGTGGACTCCGGTGATGGT<br>*****   | 480 |
| actin_4_cDNA | GTGACACACACTGTCCCAATCTACGAGGGATACGCCCTTCCACACGCCGTATCCGTCTC            | 540 |
| actin_3_cDNA | GTGACACACACCGTTCCAATCTACGAGGGATACGCCCTTCCACACGCCGTATCCGTCTC            | 540 |
| actin_1_cDNA | GTGACACACACCGTTCCAATCTATGAGGGATACGCCCTTCCACACGCCGTATCCGTCTC            | 540 |
| actin_2_cDNA | GTGACACACACCGTTCCAATCTATGAGGGATACGCCCTTCCACACGCCGTATCCGTCTC<br>*****   | 540 |
| actin_4_cDNA | GATTTGGCCGGACGTGACCTGACCGAGTACCTGATGAAGATCCTCACAGAGCGTGGTTAC           | 600 |
| actin_3_cDNA | GATTTGGCCGGACGTGACCTGACCGAGTACCTGATGAAGATCCTCACAGAGCGTGGTTAC           | 600 |
| actin_1_cDNA | GATTTGGCCGGACGTGACCTGACCGAGTACCTGATGAAGATCCTCACAGAGCGTGGTTAC           | 600 |
| actin_2_cDNA | GATTTGGCCGGACGTGACCTGACCGAGTACCTGATGAAGATCCTCACAGAGCGTGGTTAC<br>*****  | 600 |
| actin_4_cDNA | TCGCTGACAACCACCGCCGAGCGCAAATCGTCCGTGACATCAAGGAGAGTCTCTGCTTC            | 660 |
| actin_3_cDNA | TCGCTGACAACCACCGCCGAGCGCAAATCGTCCGTGACATCAAGGAGAGTCTCTGCTTC            | 660 |
| actin_1_cDNA | TCGCTGACAACCACCGCCGAGCGCAAATCGTCCGTGACATCAAGGAGAGTCTCTGCTTC            | 660 |
| actin_2_cDNA | TCGCTGACAACCACCGCCGAGCGCAAATCGTCCGTGACATCAAGGAGAGTCTCTGCTTC<br>*****   | 660 |
| actin_4_cDNA | GTCGCCGTGACTTCGAGGAGGAGATGAAGAAGGCCGCTGAGTCTTCTGCTCTTGAGAAG            | 720 |
| actin_3_cDNA | GTCGCCGTGACTTCGAGGAGGAGATGAAGAAGGCCGCTGAGTCTTCTGCTCTTGAGAAG            | 720 |
| actin_1_cDNA | GTCGCCGTGACTTCGAGGAGGAGATGAAGAAGGCCGCTGAGTCTTCTGCTCTTGAGAAG            | 720 |
| actin_2_cDNA | GTCGCCGTGACTTCGAGGAGGAGATGAAGAAGGCCGCTGAGTCTTCTGCTCTTGAGAAG<br>*****   | 720 |

|              |                                                               |      |
|--------------|---------------------------------------------------------------|------|
| actin_4_cDNA | TCTTTTCGAGCTTCCAGATGGTAACATCATCGTGATTGGAAACGAGCGCTTCCGTTGCCCA | 780  |
| actin_3_cDNA | TCTTTTCGAGCTTCCAGATGGTAACATCATCGTGATTGGAAACGAGCGCTTCCGTTGCCCA | 780  |
| actin_1_cDNA | TCTTTTCGAGCTTCCAGATGGTAACATCATCGTGATTGGAAACGAGCGCTTCCGTTGCCCA | 780  |
| actin_2_cDNA | TCTTTTCGAGCTTCCAGATGGTAACATCATCGTGATTGGAAACGAGCGCTTCCGTTGCCCA | 780  |
|              | *****                                                         |      |
| actin_4_cDNA | GAGGTCTGTTCAGCCTAACTTGACTGGTCTCGAAATGGACGGTGTGGCGACTCCACC     | 840  |
| actin_3_cDNA | GAGGTCTGTTCAGCCTAACTTGACTGGTCTCGAAATGGACGGTGTGGCGACTCCACC     | 840  |
| actin_1_cDNA | GAGGTCTGTTCAGCCTAACTTGACTGGTCTCGAAATGGACGGTGTGGCGACTCCACC     | 840  |
| actin_2_cDNA | GAGGTCTGTTCAGCCTAACTTGACTGGTCTCGAAATGGACGGTGTGGCGACTCCACC     | 840  |
|              | *****                                                         |      |
| actin_4_cDNA | TTCCAGACCATCATGAAGTGCATGTGCGATATCCGCAAGGATCTGTACGCCAACATCGTC  | 900  |
| actin_3_cDNA | TTCCAGACCATCATGAAGTGCATGTGCGATATCCGCAAGGATCTGTACGCCAACATCGTC  | 900  |
| actin_1_cDNA | TTCCAGACCATCATGAAGTGCATGTGCGATATCCGCAAGGATCTGTACGCCAACATCGTC  | 900  |
| actin_2_cDNA | TTCCAGACCATCATGAAGTGCATGTGCGATATCCGCAAGGATCTGTACGCCAACATCGTC  | 900  |
|              | *****                                                         |      |
| actin_4_cDNA | CTTTCTGGAGGAACCACCATGTTCCAGGAATCAGCGAGCGCATGTGGAAGGAGATCACC   | 960  |
| actin_3_cDNA | CTTTCTGGAGGAACCACCATGTTCCAGGAATCAGCGAGCGCATGTGGAAGGAGATCACC   | 960  |
| actin_1_cDNA | CTTTCTGGAGGAACCACCATGTTCCAGGAATCAGCGAGCGCATGTGGAAGGAGATCACC   | 960  |
| actin_2_cDNA | CTTTCTGGAGGAACCACCATGTTCCAGGAATCAGCGAGCGCATGTGGAAGGAGATCACC   | 960  |
|              | *****                                                         |      |
| actin_4_cDNA | GCCCTCGCCCCAGCCTCCATCAAGGTCAAGATCGTGGCCCCACCGGAGCGAAAGTACTCC  | 1020 |
| actin_3_cDNA | GCCCTCGCCCCAGCCTCCATCAAGGTCAAGATCGTGGCCCCACCGGAGCGAAAGTACTCC  | 1020 |
| actin_1_cDNA | GCCCTCGCCCCAGCCTCCATCAAGGTCAAGATCGTGGCCCCACCGGAGCGAAAGTACTCC  | 1020 |
| actin_2_cDNA | GCCCTCGCCCCAGCCTCCATCAAGGTCAAGATCGTGGCCCCACCGGAGCGAAAGTACTCC  | 1020 |
|              | *****                                                         |      |
| actin_4_cDNA | GTGTGGATCGGAGGATCCATCCTCGCTTCCCTGTCTACATTCCAGAGCATGTGGATCAGC  | 1080 |
| actin_3_cDNA | GTGTGGATCGGAGGATCCATCCTCGCTTCCCTGTCTACATTCCAGAGCATGTGGATCAGC  | 1080 |
| actin_1_cDNA | GTGTGGATCGGAGGATCCATCCTCGCTTCCCTGTCTACATTCCAGAGCATGTGGATCAGC  | 1080 |
| actin_2_cDNA | GTGTGGATCGGAGGATCCATCCTCGCTTCCCTGTCTACATTCCAGAGCATGTGGATCAGC  | 1080 |
|              | *****                                                         |      |
| actin_4_cDNA | AAGGAGGAGTACGACGAGTCCGGTCCATCCATCGTCCACCGCAAGTGCTTCTAA        | 1134 |
| actin_3_cDNA | AAGGAGGAGTACGACGAGTCCGGTCCATCCATCGTCCACCGCAAGTGCTTCTAA        | 1134 |
| actin_1_cDNA | AAGGAGGAGTACGACGAGTCCGGTCCATCCATCGTCCACCGCAAGTGCTTCTAA        | 1134 |
| actin_2_cDNA | AAGGAGGAGTACGACGAGTCCGGTCCATCCATCGTCCATCGCAAGTGCTTCTAA        | 1134 |
|              | *****                                                         |      |

**Supplementary Figure 3:** Clustal Omega alignment of the four *C. australis* mRNA sequences. Identical nucleotides are highlighted in grey and indicated with an asterisk (\*).

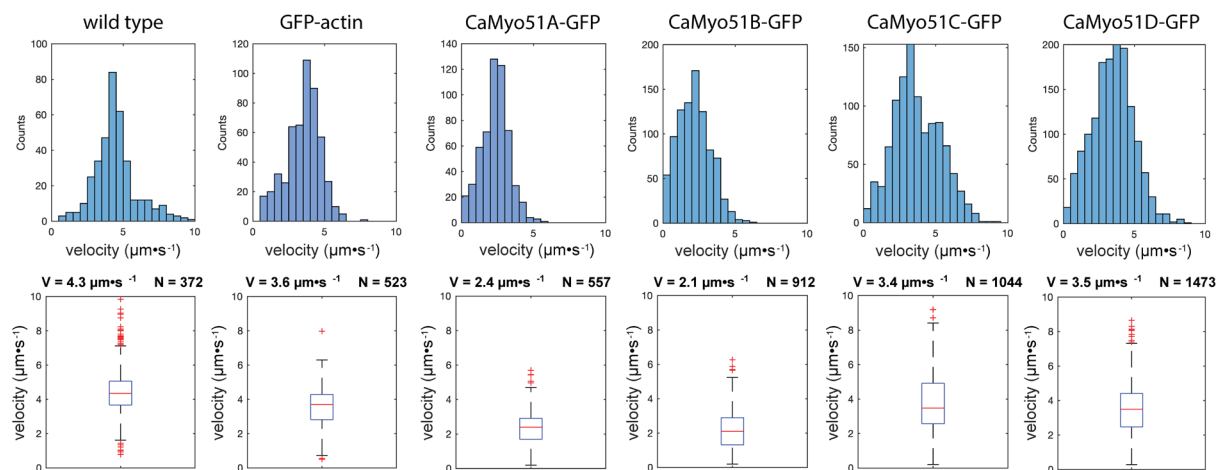

**Supplementary Figure 4: Cell motility analysis of *C. australis* cell lines.** Histograms (upper panels) and corresponding box plots (lower panels) showing the distribution of cell velocities in populations of wild type *C. australis* (far left) and *C. australis* cell lines expressing actin or myosins as GFP fusion proteins used for TIRFM analyses of actin and myosin dynamics. In the box plots, the red center lines denote the median (50<sup>th</sup> percentile) values, with the blue boxes having lower and upper bounds of the 25<sup>th</sup> and 75<sup>th</sup>, respectively. The black whiskers indicate the 5<sup>th</sup> and 95<sup>th</sup> percentiles, and outlier values outside of this range are indicated by red plus signs. N represents the number of investigated cells.

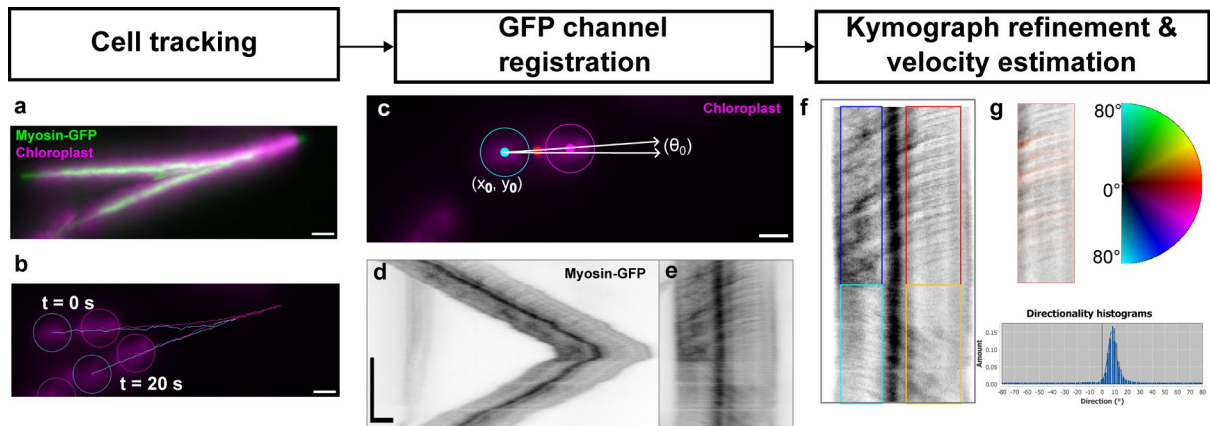

**Supplementary Figure 5: Image analysis pipeline.** **a** Maximum projection of a 20 s dual-channel movie of a gliding cell. **b** Overlay of tracks generated using TrackMate using the chloroplast autofluorescence signal in the far red optical spectrum. Chloroplast positions (circles) are shown only for the first and last frames. **c** Chloroplast positions for each frame were used to determine the position of the midpoint between the two chloroplasts (red dot) and the angle of the cell relative to a horizontal origin. **d, e** Kymographs of myosin-GFP signals (in black) generated by reslicing and projecting each row of pixels of the image before (**d**) and after (**e**) registration using displacement and angle values. **f** Refined kymograph after performing a Fast-Fourier-Transformation, masking horizontal traces, and inverting the Fourier transformation. Indigo, red, cyan and yellow boxes indicate regions-of-interest (ROIs) used for directionality measurements. **g** Orientation map showing the preferred orientation of the myosin-GFP signals in the red ROI shown in **f** (top left), color wheel showing gradient of colors used to indicate angle (top right) and histogram of estimated angles generated by the directionality plugin in Fiji. Scale bars – horizontal 5  $\mu\text{m}$ , vertical 5 s.

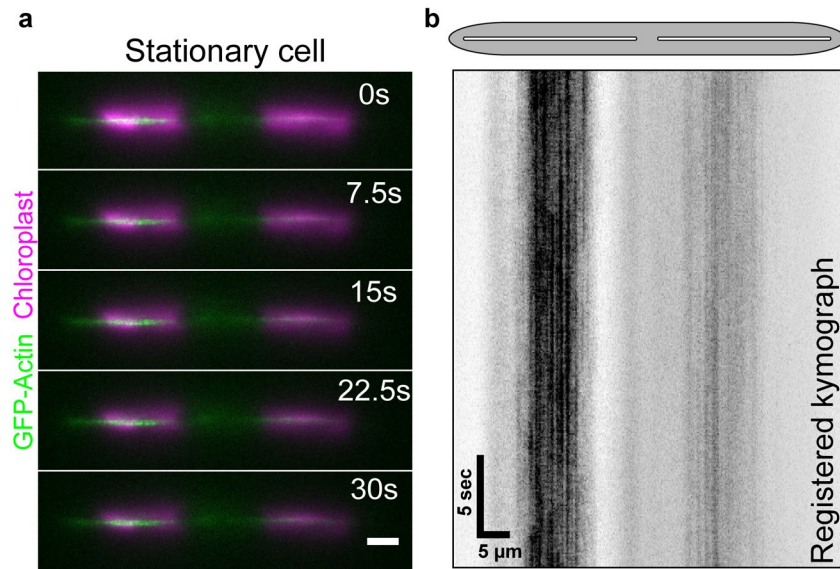

**Supplementary Figure 6: TIRFM based kymograph analysis of GFP-actin in stationary cells.** **a** Montage generated for dual-channel TIRFM data showing the positions of a stationary cell at 7.5 s intervals (GFP-actin in green and chloroplast autofluorescence in magenta, generated from Supplementary Movie S2). **b** Kymograph analysis of GFP-actin movement. GFP-channel data from the **Supplementary Movie S2** shown in **a** was registered using cell tracking data (GFP-actin in black). Gray ellipse and white slits above kymograph approximate the positions of the cell body and raphe openings, respectively. (Scale bars: horizontal = 5 μm, vertical = 5 s)



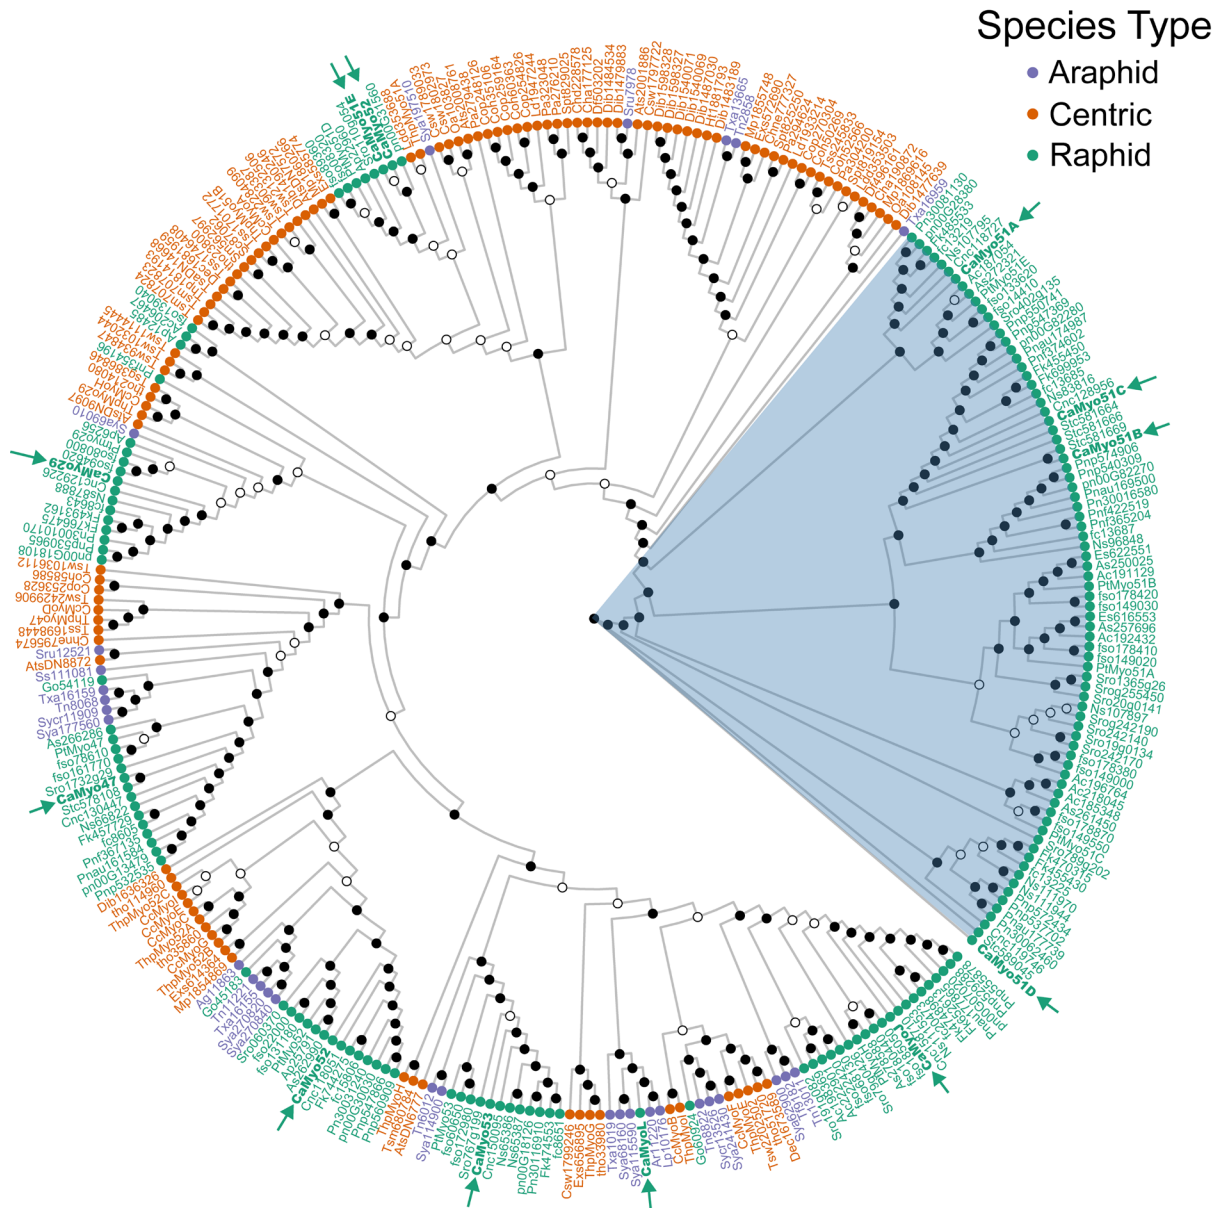

**Supplementary Figure 7: Phylogenomic analysis of diatom myosins.** Cladogram of 309 diatom myosins. The position of *C. australis* myosins (CaMyoX, 12 sequences) are in bold and labeled with a green arrow. A large clade containing only raphid diatom myosins, including the four *C. australis* myosins investigated in this study (CaMyo51A-D) is highlighted in blue. Node tips are color coded by species type. Internal nodes indicate Ufboot bootstrap scores of <95 (hollow nodes) or  $\geq 95$  (solid nodes). Species name are abbreviated as follows as the full sequence names can be found in Supplementary Table 1. *Amphora coffeaeformis* (Ac); *Asterionellopsis glacialis* (Ag); *Amphiprora paludosa* (Ap) *Astrosyne radiata* (Ar); *Amphiprora sp* (As); *Attheya septentrionalis* (Ats); *Craspedostauros australis* (Ca); *Cyclotella cryptica* (Cc); *Chaetoceros affinis* (Cha); *Chaetoceros debilis* (Chd); *Chaetoceros neogracile* (Chne); *Cylindrotheca closterium* (Cnc); *Corethron hystrix* (Coh); *Corethron pennatum* (Cop); *Coscinodiscus wailesii* (Csw); *Detonula confervacea* (Dec); *Dactyliosolen fragilissimus* (Df); *Ditylum brightwellii* (Dib); *Entomoneis sp* (Es); *Extubocellulus spinifer* (Exs); *Fragilariopsis*

*cylindrus* (Fc); *Fragilariopsis kerguelensis* (Fk); *Fistulifera solaris* (Fso); *Grammatophora oceanica* (Go); *Helicotheca tamesis* (Ht); *Leptocylindrus danicus* (Ld); *Leptocylindrus danicus* var *danicus* (Ldd); *Licmophora paradoxa* (Lp); *Minutocellus polymorphus* (Mp); *Nitzschia* sp (Ns); *Odontella aurita* (Oa); *Proboscia alata* (Pa); *Pseudo-nitzschia multiseriata* (Pn); *Pseudo-nitzschia australis* (Pnau); *Pseudo-nitzschia fraudulenta* (Pnf); *Pseudo-nitzschia pungens* (PnP); *Phaeodactylum tricornutum* (Pt); *Skeletonema costatum* (Sc); *Skeletonema menzelii* (Sm); *Stephanopyxis turris* (Spt); *Seminavis robusta* (Sro); *Striatella unipunctata* (Sru); *Staurosira* sp. (Ss); *Stauroneis constricta* (Stc); *Synedro acus* (Sya); *Synedropsis cf recta* (Sycr); *Thalassionema frauenfeldii* (Tf); *Thalassiosira pseudonana* (Thp); *Thalassionema nitzschioides* (Tn); *Thalassiosira antarctica* (Tsa); *Thalassiosira gravida* (Tsg); *Thalassiosira miniscula* (Tsm); *Thalassiosira* sp. (Tss); *Thalassiosira oceanica* (Tho); *Thalassiosira weissflogii* (Tsw); *Thalassiothrix antarctica* (Txa)

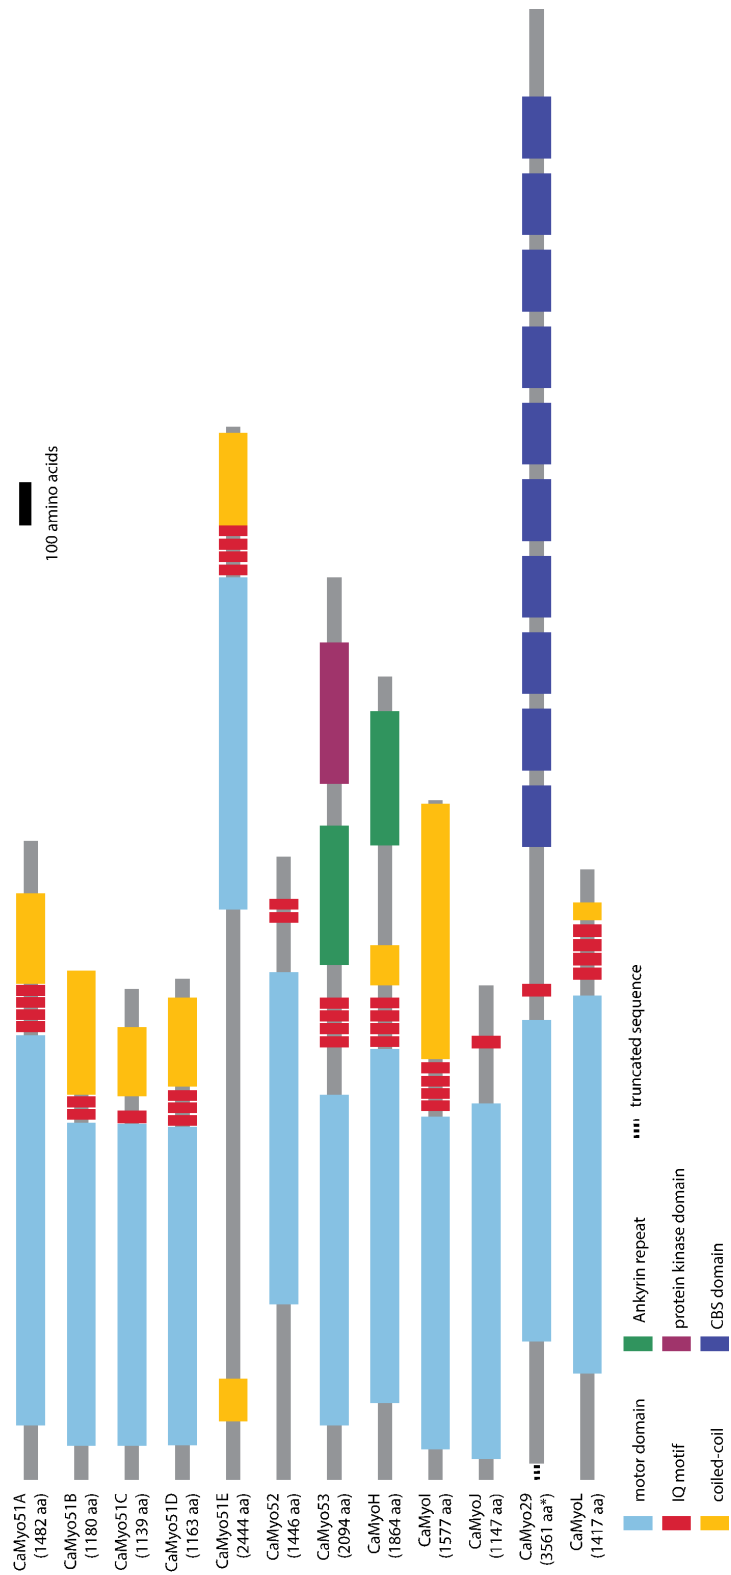

**Supplementary Figure 8.** Schematic of twelve predicted *C. australis* myosins

|          |                                                                |     |
|----------|----------------------------------------------------------------|-----|
| CaMyo51A | LHEAAILYNLKHARHV-QALPYTRTGDIVIAVNPYQWFHVLVYSHDNQNTYSEALIWKNRSN | 59  |
| CaMyo51D | LHEAAILYNLKERHC-SAKPYTRVSDIVIAVNPYQWLTDLYTEKVRLLYYAQKLVWEQSE-  | 58  |
| CaMyo51B | LHEAAILYNLKERHL-NNHPYTRTGDIVIAVNPYQWFKEIYTEKVRARFANKLVWEDHE-   | 58  |
| CaMyo51C | LHEPAILFNLKERHG-SGKPYTRTGDIIIAVNPYQWFKEIYTEKVRNRYARILVWENVN-   | 58  |
| CeMyo5   | LHEPAVLHNLQVRFVKGSSIIYTYCGIVLVAINPYADCSHIYGEEIIQVYRGA-----     | 52  |
| DdMyo1E  | ITENAFIENLTMRHK-SDNIYTYIGDVVISTNPFKNL-NIYKESDIKAYNGR-----      | 50  |
| HsMhc2   | LHEPAVLYNLKERYA-AWMIYTYSGLFCVTVNPKWL-PVYKPEVVTAYRGG-----       | 50  |
| OcMhc1   | LHEPAVLYNLKEXYA-AWMIYTYSGLFCVTVNPKWL-PVYNAEVVTAYRGG-----       | 50  |
|          | : * * .: ** . ** . . : : **: : * . :                           |     |
| CaMyo51A | ITKRKSTSKPNSNDNSNSNNSNNQTKSQTPQSQGEGASPTADISDPRNGLVPHVYEAS     | 119 |
| CaMyo51D | -----QDPRQGLPPHIYEVS                                           | 73  |
| CaMyo51B | -----GDARVLVEPHVYEAS                                           | 73  |
| CaMyo51C | -----GDQRSQVEPHVYETS                                           | 73  |
| CeMyo5   | -----GKSAREMDPHIFAVA                                           | 67  |
| DdMyo1E  | -----YKYEMPPHIYALA                                             | 63  |
| HsMhc2   | -----KRQEAPPHIFISIS                                            | 63  |
| OcMhc1   | -----KRQEAPPHIFISIS                                            | 63  |
|          | ***: :                                                         |     |
|          | <b>P-loop</b>                                                  |     |
| CaMyo51A | ALAYQGLAARGDDQSILVSGESGAGKTETVKICMSHLASIQNLTPKQRQKQVRLNAAVSS   | 179 |
| CaMyo51D | SLCYRGLAYEGVNSILVSGESGAGKTETVKICMNHIASVQKDP TAV-----           | 120 |
| CaMyo51B | SLAYKGLAFEGSDQSILVSGESGAGKTETVKICMNHIASVQRGPTSD-----           | 120 |
| CaMyo51C | ALAYNGLAFGGNDQSILVSGESGAGKTETVKICMNHIASCQQGPTAK-----           | 120 |
| CeMyo5   | EEAHFDMGAFGKSQSIIVSGESGAGKTVSAKFMRYLASVAASKTRNGG-----          | 116 |
| DdMyo1E  | NDAYRSMRQSQENQCVIISGESGAGKTEASKKIMQFLT FVSSNQSPNG-----         | 111 |
| HsMhc2   | DNAYQFMLTDRENQSILITGESGAGKTVNTKRVIQYFATIAVTGKKE-----           | 112 |
| OcMhc1   | DNAYQFMLTDRENQSILITGESGAGKTVNTKRVIQYFATIAVTGDKKE-----          | 112 |
|          | .: : .*.:::***** * : .: :                                      |     |
|          | <b>Switch-1</b>                                                |     |
| CaMyo51A | ASSVASSALSTTGSASAPANSEIVQRVLDNSNPLLEAFGNAKTLRNDNSSRFGKYIQLQFD  | 239 |
| CaMyo51D | -----SEID---ADAVNRI LDSNPLLEAFGNAKTRRNDNSSRFGKYIVLQFD          | 165 |
| CaMyo51B | -----ADGGAKFSDPIVQRIMESNPLLEAFGNAKTRRNDNSSRFGKYTQLQFD          | 168 |
| CaMyo51C | -----GGGN---NVVVNRVLESNPLLEAFGNAKTRRNDNSSRFGKYCQLQFD           | 164 |
| CeMyo5   | -----T-----TSIEARVLASNPIMESIGNAKTIRNDNSSRFGKFIQINFC            | 157 |
| DdMyo1E  | -----ERISKMLLDSNPLLEAFGNAKTLRNDNSSRFGKYMENQFN                  | 151 |
| HsMhc2   | -----EITSGKIQGTLEDQIISANPLLEAFGNAKTVRNDNSSRFGKFIRIHFG          | 160 |
| OcMhc1   | -----EATSGKMQGTLEDQIISANPLLEAFANAKTVRNDNSSRFGKFIRIHFG          | 160 |
|          | : : : **:* : : .*** *****: : *                                 |     |
| CaMyo51A | NPLSHQLHNASSIDDMAVAATGMSSRQQVLAQSTGTASRCILAGSKCEVYLLEKSRVISH   | 299 |
| CaMyo51D | RKEPKN-----VGDNPRAIMSGSKCEVYLLEKSRVVYH                         | 198 |
| CaMyo51B | MGDKSS-----KAFATDKASRKNLAGSKCEVYLLEKNRVTTH                     | 206 |
| CaMyo51C | MGTKAE-----QEFRG-RDKATCVLAGSKCDVYLLEKNRVVMH                    | 201 |
| CeMyo5   | ERGR-----RIVGAEMKTYLLEKSRLVFQ                                  | 181 |
| DdMyo1E  | AVGS-----PIGKITNYLLEKSRVVG                                     | 174 |
| HsMhc2   | TTGK-----LASADIETYLLEKSRVVFQ                                   | 183 |
| OcMhc1   | TTGK-----LASADIETYLLEKSRVTFQ                                   | 183 |
|          | ... *****.*: :                                                 |     |
| CaMyo51A | AEGERTFHIFFYQLLAAPPEYKATVWSGLEDTDNESFCYVGWTDNTIEGRSDEDRFQLTL   | 359 |
| CaMyo51D | DETERTYHIFFYQLLNAPESEKVKIWKGLKGTKNESFAYVVGKSPEVRIDGKEDSEHFPETK | 258 |
| CaMyo51B | DTTERTYHSFYQLLAAPENEKVEIWSSELKGTNYESFAYIGTPTDVIIEGKKDGDHWHHTL  | 266 |
| CaMyo51C | DPEERTYHIFFYQIIASK--HKTKYWSHLAGT TNESFRFVKGAPDTIEGMDGDHFNETH   | 259 |
| CeMyo5   | APGERNYHIFFYQLCAARNHQVLKD--LHLGPC-ESYSYLTQGGDSRIPGVDDKADFEALL  | 238 |
| DdMyo1E  | TQGERSFHIFFYQMLKGLSQSKLNE--LGLTPNAPAYEYLLKSGCFDVSTIDDSGEFKIIV  | 232 |
| HsMhc2   | LKAERSYHIFFYQITSNKKPELIEM--LLITNPNYDYPFV-SQGEISVASIDDQEELMATD  | 240 |
| OcMhc1   | LKAERSYHIFFYQIMSNNKPPDLIEM--LLITNPNYDYAFV-SQGEITVPSIDDQEELMATD | 240 |
|          | **.:* ***: : : : : *                                           |     |
| CaMyo51A | NSLALVGVIDDKLLKALLRAICIVLQLGNLEFAP--LDD---DKCVISTDEELMELAELE   | 413 |
| CaMyo51D | KALEIVGIKDDKYITLFAQIAAVLQLGNLSFAPKPGND---EESVVTSKKEFKELAELE    | 314 |
| CaMyo51B | EILDITINVKGNDRRDLMRAMCIVLQLGNVSEFMKDPND---DRSVVKDRKEFDKLAALM   | 322 |
| CaMyo51C | KVLEKVGVDNDNMLTLMQAI IIVLQIGNLTFGPDPKDD---ERSVVTSTKDFALAELE    | 315 |
| CeMyo5   | KALQLLGFDEKQMSDVFRLLAGLLLLGNVHFENGEGSSAVSASSC--QEISR--LCREFW   | 294 |
| DdMyo1E  | KAMETLGLKESDQNSIWRILAAIHLHIGNITFAEAAEQRTGTMTT-VKVSDTKSLAAASCL  | 291 |
| HsMhc2   | SAIDILGFTNEEKVSIYKLTGAVMHYGNLKFQKQREEQAE PDGTEVAD-----KAAYLQ   | 295 |
| OcMhc1   | SAIDILGFTSDERVSIYKLTGAVMHYGNMKEKQKQREEQAE PDGTEVAD-----KAAYLQ  | 295 |
|          | .: : . . : : : : **:*                                          |     |

|          |                                                                |                                           |     |
|----------|----------------------------------------------------------------|-------------------------------------------|-----|
| CaMyo51A | DVPPDELAVALLVRTVTAKGE----                                      | TFQVPLKAETAKDSTDAFAKEIYAKTFLWLVRTIN       | 469 |
| CaMyo51D | GCEEDLLGRAFTERTIKTRGE----                                      | EYKVPLKSDVSKESADAFKAIYAKIFLWLVRIN         | 370 |
| CaMyo51B | GVTNQDLVDCLTERTMKTRNE----                                      | SYKVP LNADVAKESADAFKAIYSKLF LWLVRALN      | 378 |
| CaMyo51C | CVPEEAMECSFTERTMKTRNE----                                      | TYKVP LNATVAKESAFAKAIYGR LFLWLVRIN        | 371 |
| CeMyo5   | KISESDLRIWLTRREIRAVNE----                                      | IVTKPLTKNEAVRSRDALTKMLYSHLFGWLVDKIN       | 350 |
| DdMyo1E  | KTDQQSLSIALCYRSISTGVGKRCSSVISPMDCNQAAYS RDALAKALYERLFNWLVS KIN |                                           | 351 |
| HsMhc2   | SLNSADLLKALCYPRVKVGN EYVT----                                  | KGQTVQVSNVAVGALAKAVYEKMFLWVVARIN          | 351 |
| OcMhc1   | SLNSXDLLKALCYPRVKVGN EYVT----                                  | KGQTVQQVYNAV GALAKAVYEKMFLWVTRIN          | 351 |
|          | :                                                              | :                                         | :   |
|          |                                                                | <b>Switch-2</b>                           |     |
| CaMyo51A | DATCAENNYRNASFDHQRFVIGL                                        | LDIFGFETFEVNRFEQLCIN YANEK LQQKFTQDIFR    | 529 |
| CaMyo51D | DATCAENNYPGADAN-TEFGV                                          | VGLLDIFGFESFPINGFEQLCIN YCNEK LQAKFTHDIFQ | 429 |
| CaMyo51B | DATCAELNYEGG-MD-KHFGV                                          | IGLLDIFGFESFVRNRFEQLCIN YANEK LQAKFTEDIFR | 436 |
| CaMyo51C | DATSAELNYKSG-LM-EHFGV                                          | IGLLDIFGFESFVRNRFEQLCIN YANEK LQAKFTEDIFR | 429 |
| CeMyo5   | EALNEKDKLDGNTQKKRPDRF                                          | IGLVDIYGFETFDVNSFEQFSIN YANEK LQQQFNQHVFK | 410 |
| DdMyo1E  | TIINCT-----TEKGPVIGL                                           | LDIYGFVFNNSFEQLNINFCNEK LQQLFIELTLK       | 402 |
| HsMhc2   | QQLDTK-----QPRQYF                                              | IGLVDIAGFEIFDFNSLEQLCIN FTNEK LQQFFNHHMFV | 402 |
| OcMhc1   | QQLDTK-----QPRQYF                                              | IGLVDIAGFEIFDFNSLEQLCIN FTNEK LQQFFNHHMFV | 402 |
|          |                                                                | : : * : * : * * : *                       |     |
| CaMyo51A | SVQTEYEFEGIELGEITYDDNTDV                                       | -LDLVEGGMGLLALLNEECV RPKGSDKTFVFKAQAM     | 588 |
| CaMyo51D | TVQEEYKAEGLNLDIQYDDNSDV                                        | -LELIEGKFGI IKQLNEECV RPKGNDEAFVSKALQS    | 488 |
| CaMyo51B | SVQEEYEFEGIPLEIKYDDNTDV                                        | -LDLIEGKAGLLAMLNEECV RPKGGDDAFVAKALAA     | 495 |
| CaMyo51C | SVQDEYEKEGIPLEIKYDDNTDV                                        | -LDLIEGKGLLAMLNEECV RPKGTDQAFVTKALAA      | 488 |
| CeMyo5   | LEQEEYIREEIEWVVRVDFHDN                                         | QPA-IDLIEGPVGMINLLDEQCKRLNGSDADWLSQLQNS   | 469 |
| DdMyo1E  | SEQEEYVREGIEWKNI EYFNKPI                                       | CELIEKKPIGLISLLDEACLI AKSTDTQTFDLSICKQ    | 462 |
| HsMhc2   | LEQEEYKKEGIEWTFIDFGMDL                                         | AACIELIEKPMGIFSILEEEECMFPKATDTSFKNKLYDQ   | 462 |
| OcMhc1   | LEQEEYKKEGIEWEFIDFGMDL                                         | AACIELIEKPMGIFSILEEEECMFPKATDTSFKNKLYEQ   | 462 |
|          |                                                                | * * * : : : : : * : * * : . * : .         |     |
| CaMyo51A | NK-----DNAVWIREPHYSATSE                                        | GIRHYAGKVTYDSNGFVTKNMDTLP TDLQDCAAKS      | 641 |
| CaMyo51D | NK-----TVPCLIAKNTFKRSE                                         | FGINHYAGAVIYTAQDFVIRNTD TLPDLQVCAKAC      | 541 |
| CaMyo51B | NK-----KSPCLIAKNTFKRSE                                         | FGINHYAGAVIYTAQDFVIRNTD TLPDLQVCAKAC      | 541 |
| CaMyo51C | NK-----QSPCLFPAK-VNRMG                                         | FGIHHYAGKVMYDAEEFVIRNQD TLPDLSDLASLC      | 540 |
| CeMyo5   | TELRKNPQLAFPK-----VRSN                                         | DFIVRHFADVTYSTDGFVEKNRDAI GEQLLDVVVAS     | 523 |
| DdMyo1E  | FE-KN-PHLQSYVSKDRSIGDTC                                        | FRLKHYAGDVTYDVRGFLDKNKD TLFGLISSMQSS      | 520 |
| HsMhc2   | HL-GKSANFQKPK--VVKGAEA                                         | HFALIH YAGVDYDYNITGWLEKNK DPLNETVVGLYQKS  | 519 |
| OcMhc1   | HL-GKSNNFQKPK--PAKRKVEA                                        | HFSLVHYAGTVDYDYNITGWLDKNK DPLNETVVGLYQKS  | 519 |
|          |                                                                | * : * . * * : : * * : :                   |     |
| CaMyo51A | SNAILAKELTNEAMNPFAPVQS                                         | STKAPETA AAAAAAPK KKKRKP KGARGRPGAPTASSA  | 701 |
| CaMyo51D | KNEILAKHLNDNDKCTNQESK                                          | -----AP-----AP-----                       | 565 |
| CaMyo51B | NNEIICKHLNNDKSTNLTKA                                           | -----P-----T-----                         | 569 |
| CaMyo51C | SNEIIAKHMTNDSCNTNFESK                                          | -----T-----KS-----                        | 563 |
| CeMyo5   | KFPFIRTIVIGSTAPTSVSS                                           | -----                                     | 542 |
| DdMyo1E  | SDPLVQGLFPPTREPDS                                              | -----                                     | 537 |
| HsMhc2   | AMKTLAQLFSGAQTAELEG                                            | -----                                     | 538 |
| OcMhc1   | AMKTLAFLFTGTAAAEAE                                             | -----                                     | 537 |
|          | :                                                              | :                                         | :   |
|          |                                                                | <b>actin binding</b>                      |     |
| CaMyo51A | SAPTSRPGHHMPRRSVKSNLVAE                                        | TVWTKFKTQLSRLMTQLNDTRTRYIRCIKPN SKKRPR    | 761 |
| CaMyo51D | ---AA-KSGRGP RRRAKSNLVAE                                       | TVMTKFKTQLSSLMKGLSTTKSRYIRCVKPN VLK KKL   | 621 |
| CaMyo51B | ---P-GAAKAP RRRAKSNLVAE                                        | TVWTKYKQLMSLMNMLAQTNSRYIRCIKPN TYKKPS     | 624 |
| CaMyo51C | ---AQ-VAKKAP RRRAKSNLVAE                                       | TVWAKYKQLMSLMNMLKTTE SKYIRCIKPNAPKKPL     | 619 |
| CeMyo5   | SSSSSTP-----GKRTIKKT                                           | VASQFRDSLKELMSVLCSTRPHYVRCIKPNDSKISF      | 593 |
| DdMyo1E  | -----KK-----RPETAGS                                            | QFRNAMNALITLLACSPHYVRCIKSNDNKQAG          | 579 |
| HsMhc2   | AGGGAKKGG-----KKGSSFQ                                          | TVSALFRENLNKLMTNLRSTHSPHFVRCIIPNETKTPG    | 592 |
| OcMhc1   | --GGGKGG-----KKGSSFQ                                           | TVSALFRENLNKLMTNLRSTHSPHFVRSIIPNETKTPG    | 589 |
|          |                                                                | * . : : : * . * : : * : *                 |     |

**Supplementary Figure 9:** Sequence alignment of the motor domain of the *C. australis* myosins CaMyo51A-D and myosins from *Oryctolagus cuniculus* (Genbank ID AAA74199.1); *Homo sapiens* (Gene bank ID: AAD29950.1), *Caenorhabditis elegans* (Genbank ID: AAA97926.1), *Dictyostelium discoideum* (Genbank ID: EAL63071.1). Identical amino acids are indicated by (\*) and highlighted in grey, a : (colon) indicates conservation between groups of strongly similar properties; a . (period) indicates conservation between groups of weakly similar properties

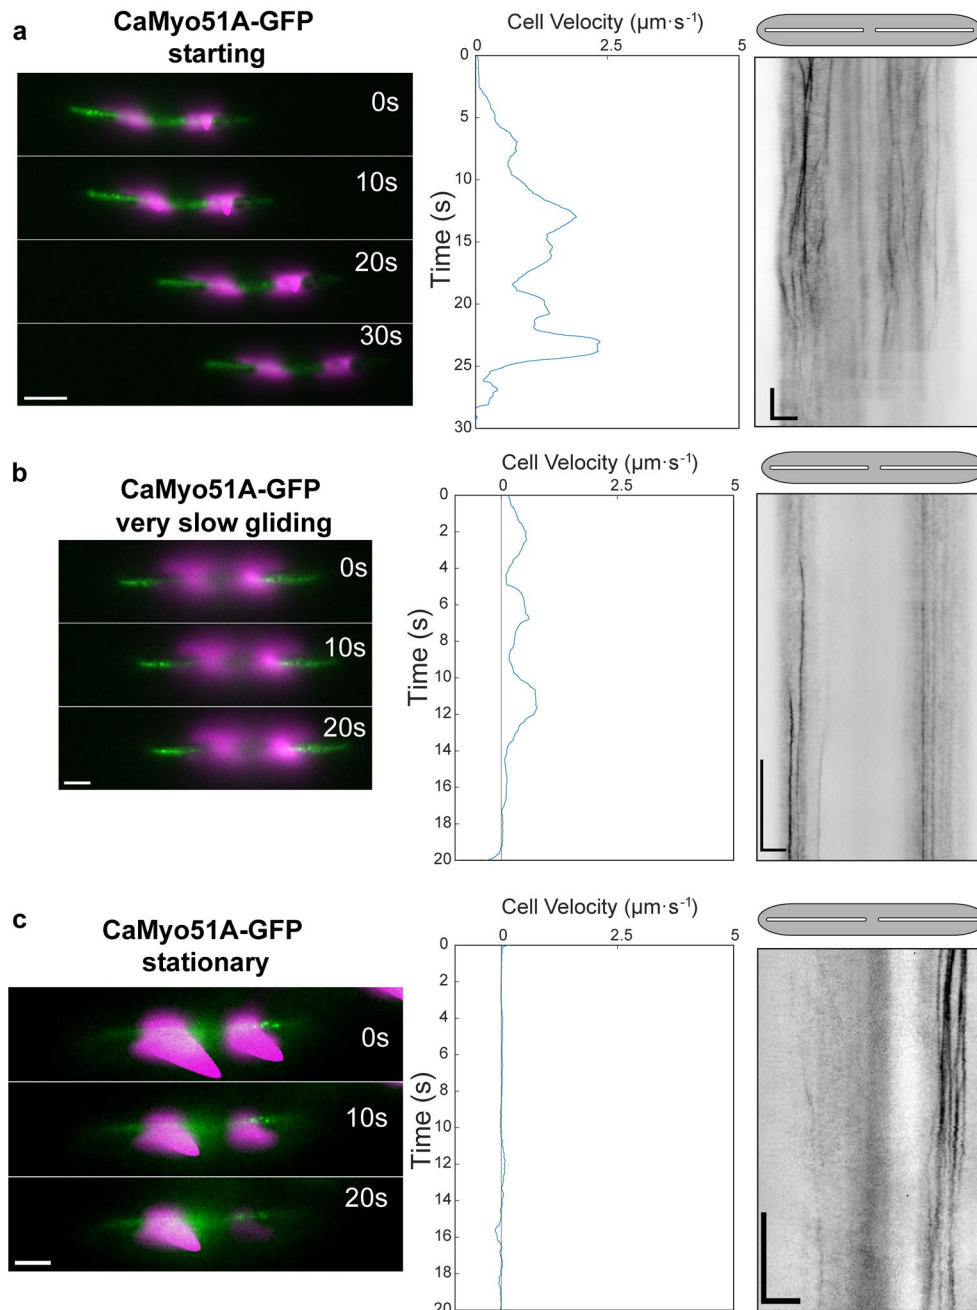

**Supplementary Figure 10: Kymograph analysis of CaMyo51A-GFP in starting, slowly-moving and stationary cells.** Analysis of 25-30 s time-lapse segments of CaMyo51A-GFP expressing cells upon **a** starting (Supplementary Movie S7), **b** slowly-moving (Supplementary Movie S8) and **c** being stationary (Supplementary Movie S9). (Left panels) Montages showing the position of cells at 10 s intervals (GFP in green, chloroplast autofluorescence in magenta, scale bars: 5  $\mu\text{m}$ ). (Middle panels) Cell velocity as function of time, generated from chloroplast tracking data. (Right panels) Registered kymographs generated from GFP-channel data (black) showing movement of myosins relative to the cell. Gray ellipses and white slits above kymographs approximate the positions of the cell body and raphe openings, respectively. (Scale bars: horizontal = 5  $\mu\text{m}$ , vertical = 5 s)

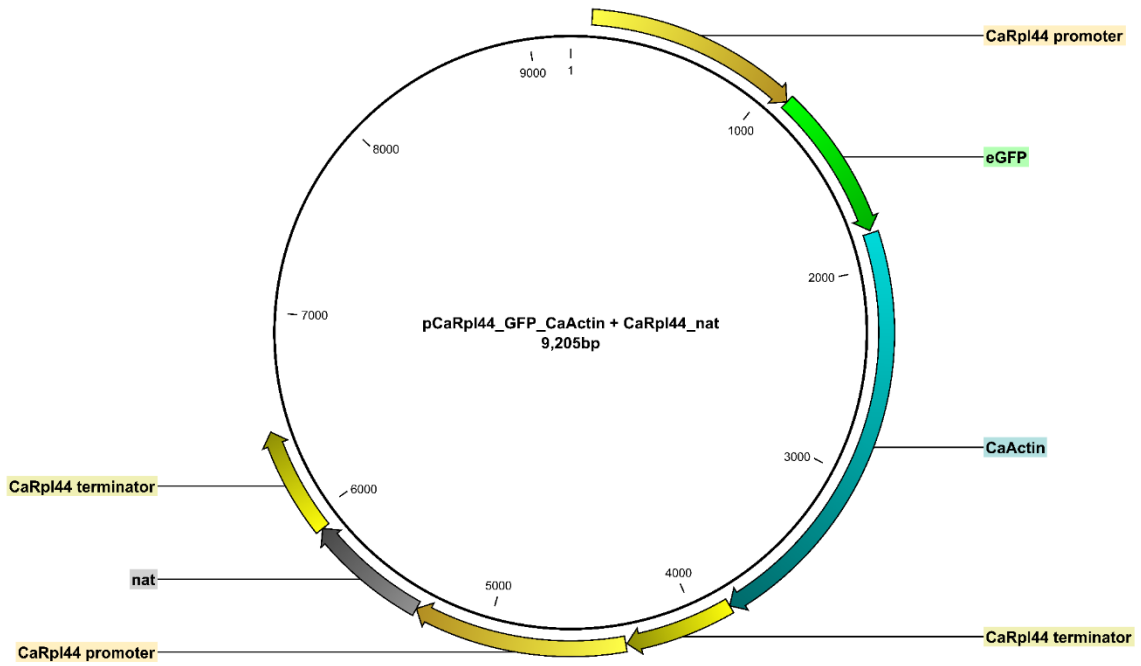

**Supplementary Figure 11:** Plasmid map of the DNA construct for N-terminal eGFP tagging of the *C. australis* Actin. nat = nourseothricin (ClonNat) resistance gene; eGFP = enhanced green fluorescent protein.

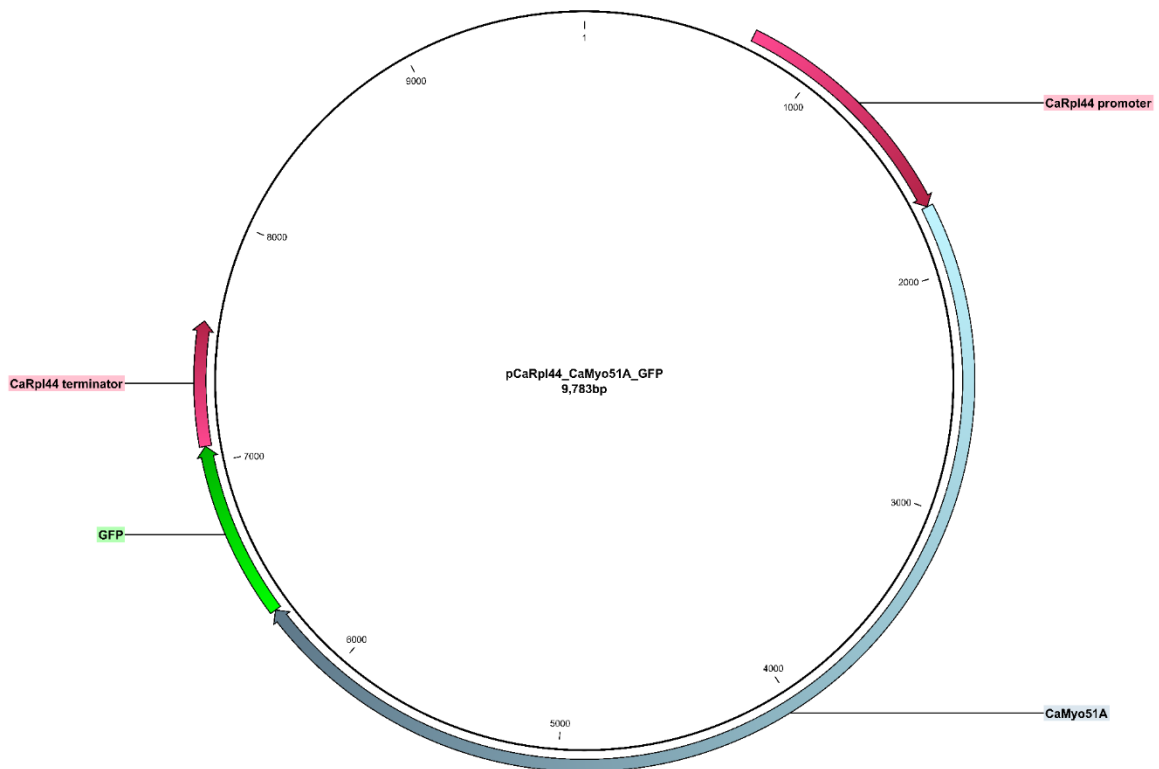

**Supplementary Figure 12:** Plasmid map of the DNA construct for C-terminal eGFP tagging of the *C. australis* CaMyo51A under the control of the CaRpl44 regulatory sequences. eGFP = enhanced green fluorescent protein.



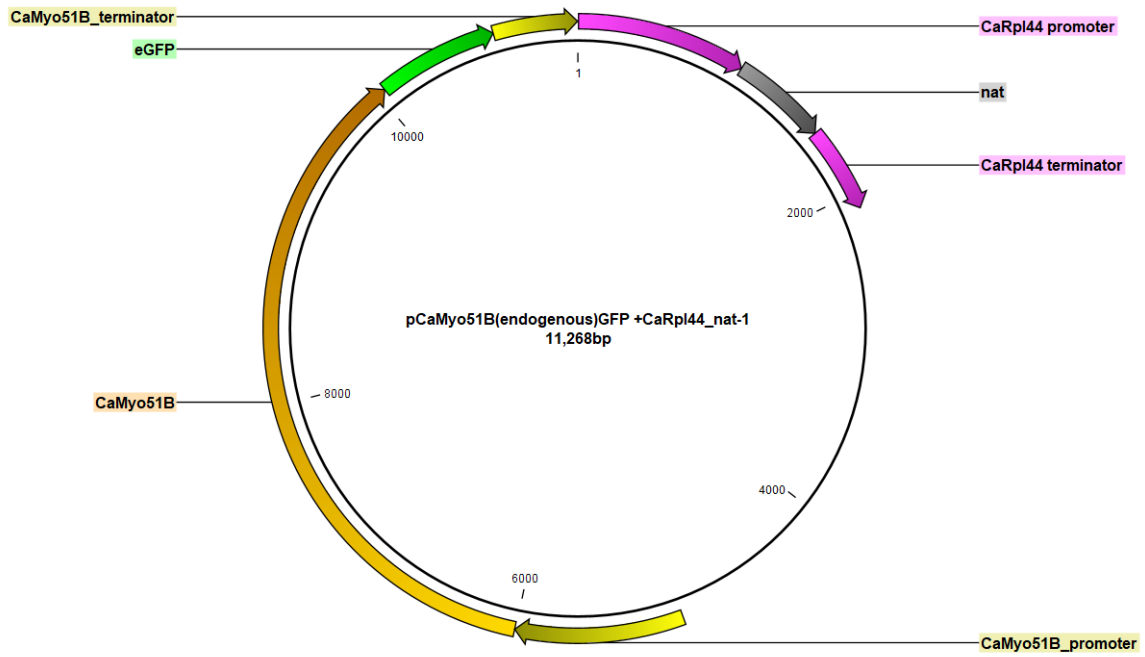

**Supplementary Figure 13:** Plasmid map of the DNA construct for C-terminal eGFP tagging of the *C. australis* CaMyo51B under the control of its endogenous CaMyo51B regulatory sequences. nat = nourseothricin (ClonNat) resistance gene; eGFP = enhanced green fluorescent protein.

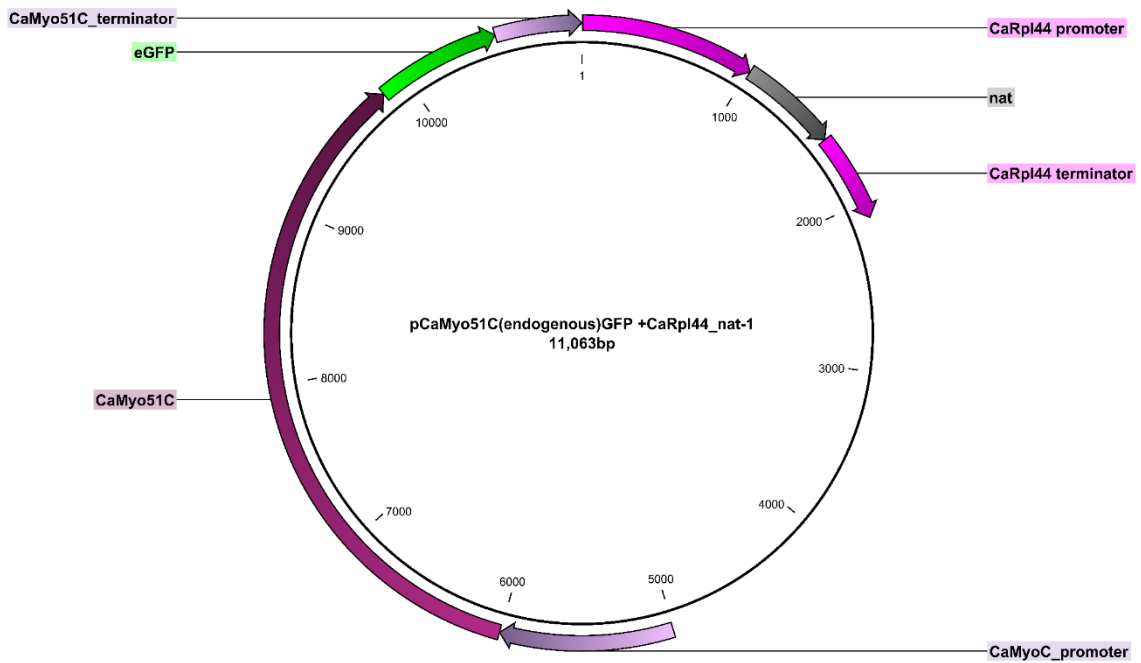

**Supplementary Figure 14:** Plasmid map of the DNA construct for C-terminal eGFP tagging of the *C. australis* CaMyo51C under the control of its endogenous CaMyo51B regulatory sequences. nat = nourseothricin (ClonNat) resistance gene; eGFP = enhanced green fluorescent protein.

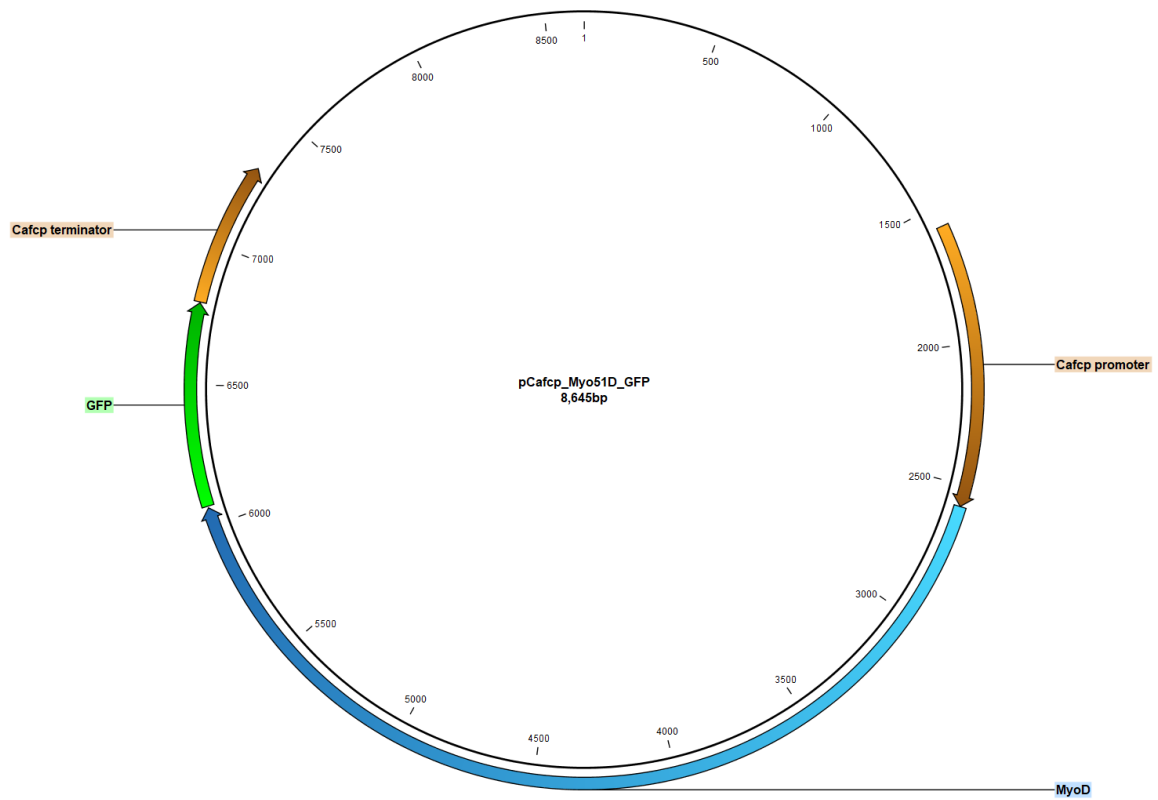

**Supplementary Figure 15:** Plasmid map of the DNA construct for C-terminal eGFP tagging of the *C. australis* CaMyo51D under the control of the Cafcp regulatory sequences. eGFP = enhanced green fluorescent protein.

## Supplementary Tables

**Supplementary Table 1: Primers used to determine full-length gene models**

| Gene                   | Sequence                                                                                                                      |
|------------------------|-------------------------------------------------------------------------------------------------------------------------------|
| <b>CaMyo51A</b>        |                                                                                                                               |
| 3'RACE                 | 1 <sup>ST</sup> PCR: 5'-AGGGTCCTCGATTCAAACCCGCTCCTCGAAGCA-3';<br>2 <sup>nd</sup> PCR: 5'-GTGCGTCCGAAGGGCTCCGACAA-3'           |
| 5'RACE                 | 1 <sup>ST</sup> PCR: 5'-CAGGGTACCCTATTCGAAACCGAAGATGTTCGAG-3';<br>2 <sup>nd</sup> PCR: 5'-GCCAGC GCGGATGCTTCGTAGA-3'          |
| Full-length gene model | sense: 5'-CCACAGACAGCGCTGCGACT-3'<br>antisense 5'-CAGGGTACCCTATTCGAAACCGAAGATGTTCGAG-3'                                       |
| Full-length gene model | sense: 5'-AGGGAATTCGATTCAAACCCGCTCCTCGAAGCA-3'<br>antisense: 5'-GGC GATGTAGGTTGCCTT-3'                                        |
| <b>CaMyo51B</b>        |                                                                                                                               |
| 3'RACE                 | 1st PCR: 5'-GCAGCCAGATCATCGCTTACC-3'<br>2nd PCR: 5'-CGCAAGGACTTCGACATCATG-3'                                                  |
| 5' RACE                | 1 <sup>st</sup> PCR: 5'-CCCTCGTGGTCTCCAGACG-3'<br>2 <sup>nd</sup> PCR: 5'-GGGCAAGTTGACCATGTCCGG -3'                           |
| Full-length gene model | sense: 5'-AAACAACAATTACAACAACCTACATGGGCAAGAAAAAGGCC-3'<br>antisense: 5'- CCTCGCCCTTGCTCACCATTCTAGAAGCTACGGATTTCGGCAGC-3'      |
| <b>CaMyo51C</b>        |                                                                                                                               |
| 3'RACE                 | 1st PCR: 5'-CCTCATCCAGGCCAACGAGTC-3'<br>2nd PCR: 5'-CGTTCGAGATGTTGAACAACC-3'                                                  |
| 5' RACE                | 1st PCR: 5'-GCTCCACCATGTCTGGGAAGG-3'<br>2nd PCR: 5'-ACTGTGGCACGCGGACTTGGG-3'                                                  |
| Full-length gene model | sense: 5'-AAACAACAATTACAACAACCTACGTATGGGCGAGAAAAAGTCCCAATACG-3'; antisense: 5'-CCTCGCCCTTGCTCACCATTCTAGACAGGCCTGGGGCGGATGC-3' |
| <b>CaMyo51D</b>        |                                                                                                                               |
| 3'RACE                 | 1ST PCR: 5'-TGCGAGAGCATGAAGCGTGAC-3'<br>2nd PCR: 5'-CGCGAAGGGATTGAACGCAAC-3'                                                  |
| 5' RACE                | 1 <sup>st</sup> PCR: 5'-GATACGGTTGACGACCGCATC-3'<br>2 <sup>nd</sup> PCR: 5'- GTCGCCGACGTTCTTGGGCTC-3'                         |
| Full-length gene model | sense: 5'-AAACAACAATTACAACAACCTACATGCCAAAGGAAAAGGAC-3'<br>antisense: 5'- CCTCGCCCTTGCTCACCATTCTAGAATCGGAATCAGAGTCCGAG-3'      |
| <b>CaMyo51E</b>        |                                                                                                                               |
| 3'-end                 | manual annotation                                                                                                             |
| 5' RACE                | 1 <sup>st</sup> PCR: 5'-GATACCTGTTGCTTCCTTTTG-3'                                                                              |

|                |                                                                                                      |
|----------------|------------------------------------------------------------------------------------------------------|
|                | 2 <sup>nd</sup> PCR: 5'-TCGCAGCAGCGCTCTTGTTGC-3'                                                     |
| <b>CaMyo52</b> |                                                                                                      |
| 3'RACE         | 1 <sup>st</sup> PCR: 5'-CAGGAATGCAAACGACTT-3'<br>2 <sup>nd</sup> PCR: 5'-CGCGTTGCACCAATATCA-3'       |
| 5' RACE        | 1 <sup>st</sup> PCR: 5'-TTGTCTACCTGCTCTTCCG-3'<br>2 <sup>nd</sup> PCR: 5'-GCACGACATTGCCATCCTC-3'     |
| <b>CaMyo53</b> |                                                                                                      |
| 3'RACE         | 1 <sup>st</sup> PCR: 5'-CAGCAACAACAGCAGCAA-3'<br>2 <sup>nd</sup> PCR: 5'-GAGAACGGAGTGCCAAAG-3'       |
| 5' RACE        | 1 <sup>st</sup> PCR: 5'-ATTTCTGGTTCTCCAAGC-3'<br>2 <sup>nd</sup> PCR: 5'-GCTTGAAGGGGTTGATGG-3'       |
| <b>CaMyo47</b> |                                                                                                      |
| 3'RACE         | 1 <sup>st</sup> PCR: 5'-GGCATTTTGGGACGACAT-3'<br>2 <sup>nd</sup> PCR: 5'-CGATATTTTGCCGTCAC-3'        |
| 5' RACE        | 1 <sup>st</sup> PCR: 5'-GAAACCAGGATCGATTGG-3'<br>2 <sup>nd</sup> PCR: 5'-GCATCGTAGCTGAGGGAGA-3'      |
| <b>CaMyoI</b>  |                                                                                                      |
| 3'RACE         | 1 <sup>st</sup> PCR: 5'-CGTCGATGAGGATGAGAT-3'<br>2 <sup>nd</sup> PCR: 5'-CGAAGATGTGAAGGCCAA-3'       |
| 5' RACE        | 1 <sup>st</sup> PCR: 5'-GGATGGATTGAGATTTGC-3'<br>2 <sup>nd</sup> PCR: 5'-CGATGGATGAAAGATGCC-3'       |
| <b>CaMyoJ</b>  |                                                                                                      |
| 3'RACE         | 1 <sup>st</sup> PCR: 5'-CAAGGAAGGCAAGGAGCA-3'<br>2 <sup>nd</sup> PCR: 5'-GTCATGAATGGGGCAACC-3'       |
| 5' RACE        | 1 <sup>st</sup> PCR: 5'-AGAATGGCCTGGTTGCAG-3'<br>2 <sup>nd</sup> PCR: 5'-CTTGTCCCAGTAGCGCTT-3'       |
| <b>CaMyo29</b> |                                                                                                      |
| 3'RACE         | 1 <sup>st</sup> PCR: 5'-ATGAGCCGCGTGTCCATGAAC-3'<br>2 <sup>nd</sup> PCR: 5'-GTCTCAAGAAGGCCTTCTGCG-3' |
| 5'-end         | truncated, manual annotation                                                                         |
| <b>CaMyoL</b>  |                                                                                                      |
| 3'RACE         | 1 <sup>st</sup> PCR: 5'-CAACGATTTGCGAGAGGG-3'<br>2 <sup>nd</sup> PCR: GAAACAGTCAAGGCCGAAG-3'         |
| 5' RACE        | 1 <sup>st</sup> PCR: 5'-GATTGGTTGACTTGCACG-3'<br>2 <sup>nd</sup> PCR: 5'-TGGAGATGGGTCAAGGTG-3'       |

## References

1. Zackova Suchanova, J. *et al.* Diatom adhesive trail proteins acquired by horizontal gene transfer from bacteria serve as primers for marine biofilm formation. *New Phytol.* **240**, 770–783 (2023).
2. Priyam, A. *et al.*, Sequenceserver: A Modern Graphical User Interface for Custom BLAST Databases, *Molecular Biology and Evolution*, **36**, 2922–2924( 2019).
3. Keeling PJ, Burki F, Wilcox HM, Allam B, Allen EE, et al. The Marine Microbial Eukaryote Transcriptome Sequencing Project (MMETSP): Illuminating the Functional Diversity of Eukaryotic Life in the Oceans through Transcriptome Sequencing. *PLOS Biology* **12**, e1001889. (2014)
4. Osuna-Cruz, C.M., Bilcke, G., Vancaester, E. *et al.* The *Seminavis robusta* genome provides insights into the evolutionary adaptations of benthic diatoms. *Nat Commun* **11**, 3320 (2020).
